# Supplementary material for: One-pot construction of CoSe nanoparticles anchored on single-atomic-Co doped carbon for pH-universal hydrogen evolution
Source: Royal Society of Chemistry journal article supplement (doi:10.1039/d2qm00893a), 2022-01-01
Supplement: d2qm00893a1.pdf [file d2qm00893a1.pdf]

# **One-Pot Construction of CoSe Nanoparticles Anchored on Single-Atomic-Co Doped Carbon for pH-Universal Hydrogen Evolution**

Sai Che<sup>a,1</sup>, Na Ta<sup>a,1</sup>, Fan Yang<sup>a,\*</sup>, Xingru Yan<sup>a</sup>, Hongchen Liu<sup>a</sup>, Neng Chen<sup>a</sup>, Siyuan Sun<sup>a</sup>, Chaonan Wang<sup>a</sup>, Bo Jiang<sup>a</sup>, Yang Sun<sup>a</sup>, Ying Wang<sup>b,\*</sup>, Yongfeng Li<sup>a,\*</sup>

<sup>a</sup>State Key Laboratory of Heavy Oil Processing, China University of Petroleum, Changping, Beijing 102249, China

<sup>b</sup>State Key Laboratory of Rare Earth Resource Utilization, Changchun Institute of Applied Chemistry, Chinese Academy of Sciences, Changchun, Jilin 130022, China

---

<sup>1</sup> These authors contributed equally to this work.

\* Corresponding authors.

E-mail: yangfan@cup.edu.cn (F. Yang), ywang\_2012@ciac.ac.cn (Y. Wang), yfli@cup.edu.cn (Y. Li).

Figure S1

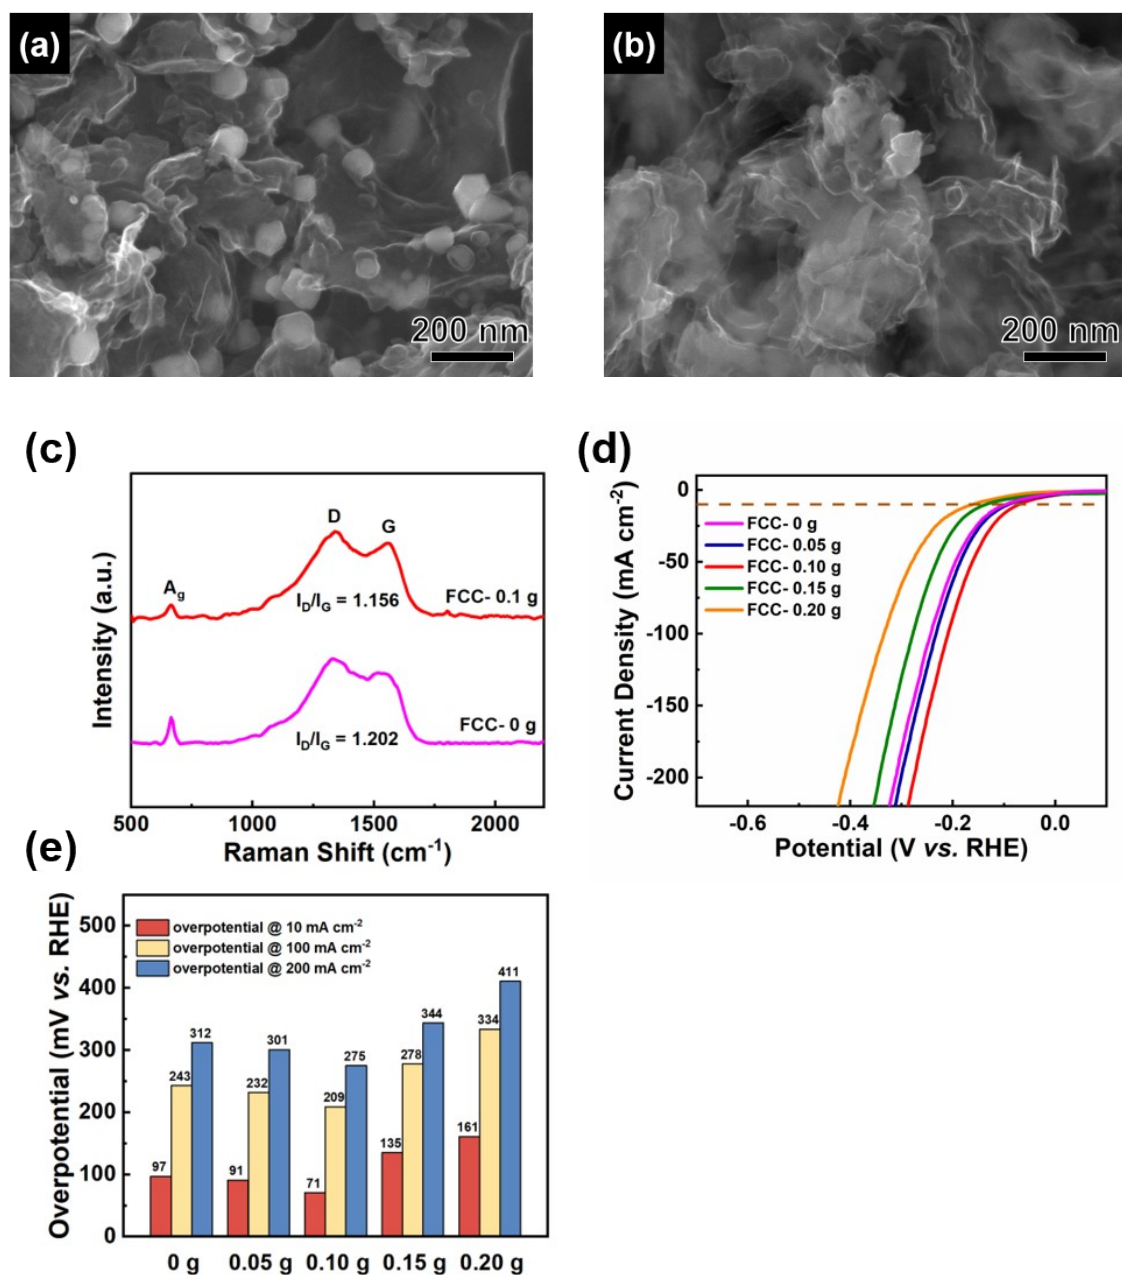

**Figure S1.** Synthetic optimization of CoSe/Co-N-C: amount of FCC slurry. SEM images of CoSe/Co-N-C with (a) 0.1 g slurry (optimized) and (b) 0 g slurry. (c) Raman spectra of CoSe/Co-N-C with 0 g and 0.1 g slurry. (d) HER LSV curves of CoSe/Co-N-C with 0 g-0.2 g slurry in 1.0 M KOH. (e)  $\eta_{10}$ ,  $\eta_{100}$ , and  $\eta_{200}$  of CoSe/Co-N-C with 0 g-0.2 g slurry in 1.0 M KOH

Figure S2

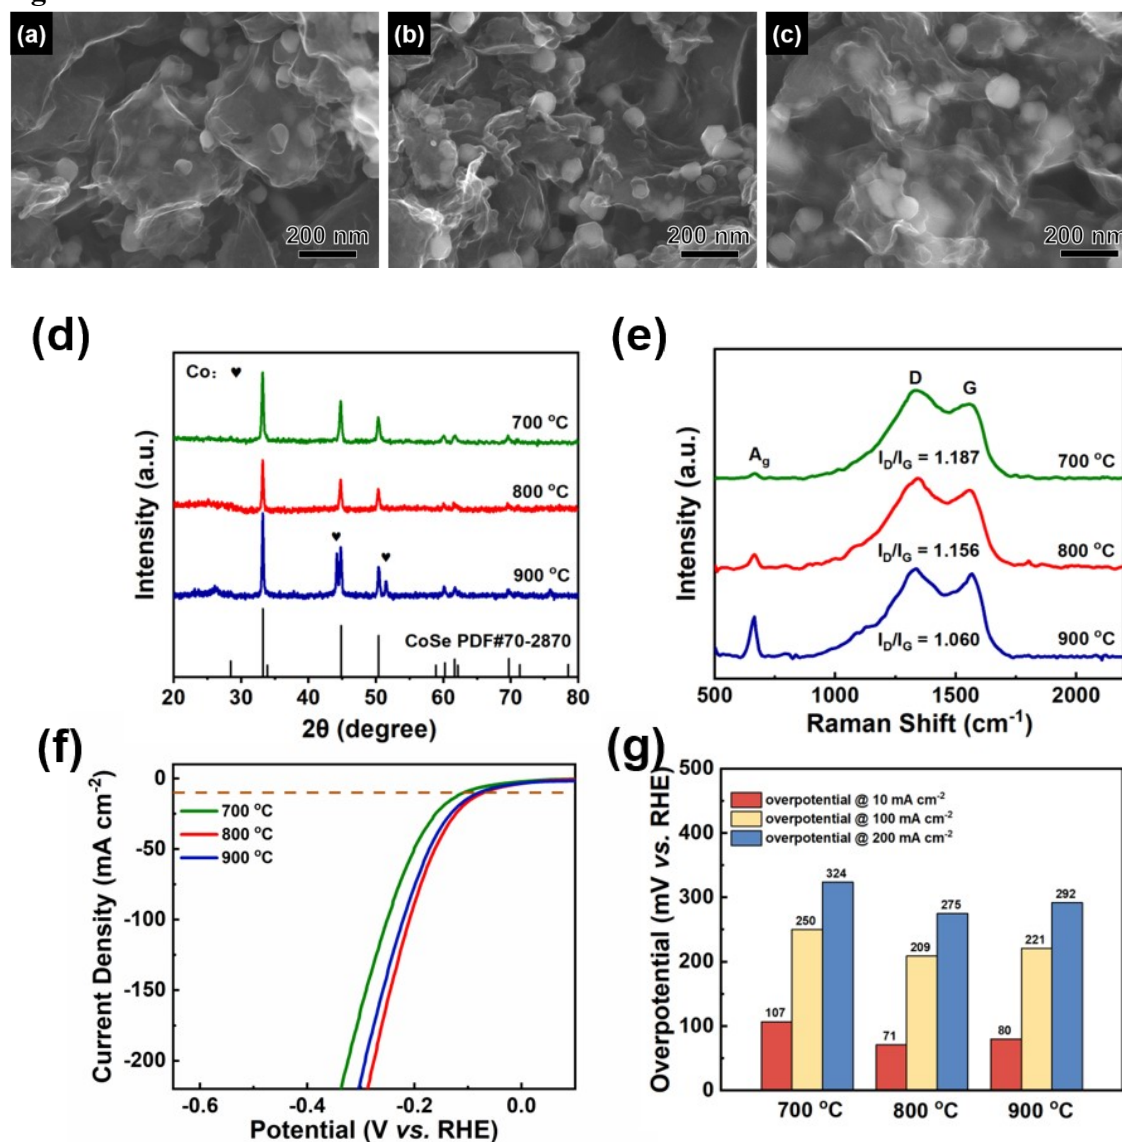

**Figure S2.** Synthetic optimization of CoSe/Co-N-C: pyrolysis temperature. SEM images of CoSe/Co-N-C pyrolyzed at (a) 800 °C, (b) 700 °C, and (c) 900 °C. (d) XRD spectra of CoSe/Co-N-C pyrolyzed at 700 °C, 800 °C, and 900 °C. (e) Raman spectra of CoSe/Co-N-C pyrolyzed at 700 °C, 800 °C, and 900 °C. (f) HER LSV curves of CoSe/Co-N-C pyrolyzed at 700 °C, 800 °C, and 900 °C in 1.0 M KOH. (g)  $\eta_{10}$ ,  $\eta_{100}$ , and  $\eta_{200}$  of CoSe/Co-N-C pyrolyzed at 700 °C, 800 °C, and 900 °C in 1.0 M KOH

**Figure S3**

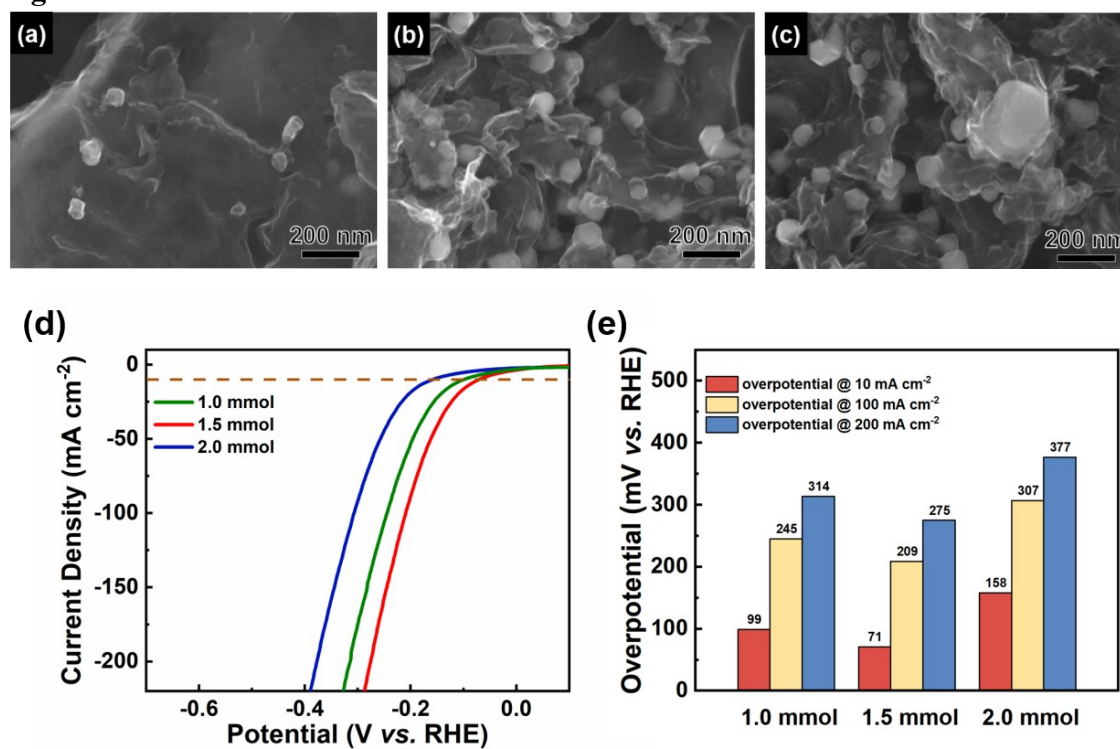

**Figure S3.** Synthetic optimization of CoSe/Co-N-C: total amount of CoCl<sub>2</sub>. SEM images of CoSe/Co-N-C with (a) 1.0 mmol CoCl<sub>2</sub>, (b) 1.5 mmol CoCl<sub>2</sub> (optimized), and (c) 2.0 mmol CoCl<sub>2</sub>. (d) HER LSV curves of CoSe/Co-N-C with 1.0 mmol, 1.5 mmol, and 2.0 mmol CoCl<sub>2</sub> in 1.0 M KOH. (g)  $\eta_{10}$ ,  $\eta_{100}$ , and  $\eta_{200}$  of CoSe/Co-N-C with 1.0 mmol, 1.5 mmol, and 2.0 mmol CoCl<sub>2</sub> in 1.0 M KOH

**Figure S4**

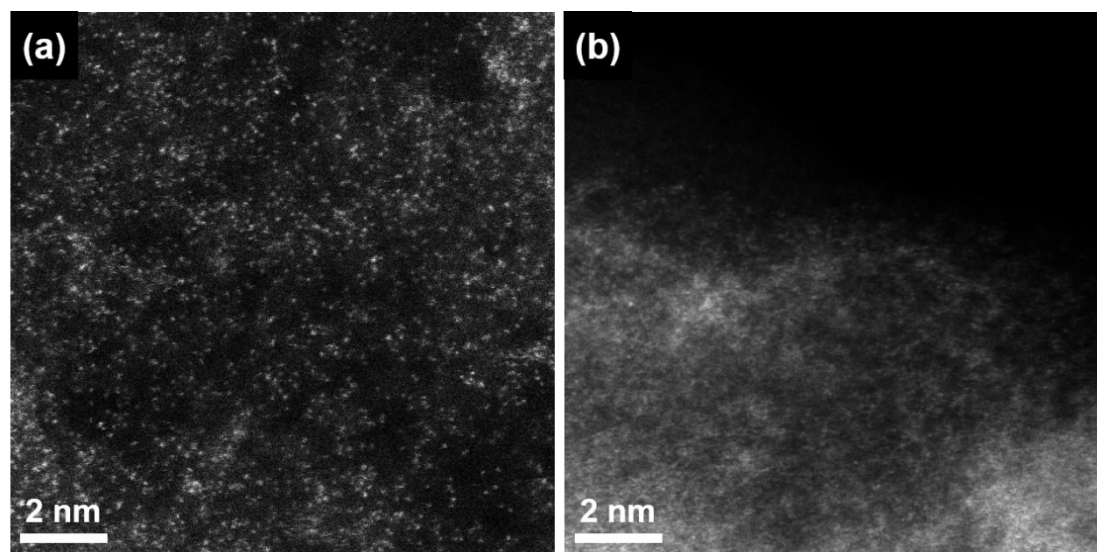

**Figure S4.** Aberration-corrected high-angle annular darkfield scanning transmission electron microscopy (AC HAADF-STEM) images of (a) Co-N-C and (b) CoSe/N-C.

**Table S1.** Porosity analysis of the representative catalysts

| <b>Catalysts</b>   | <b>BET surface area<br/>(m<sup>2</sup> g<sup>-1</sup>)</b> | <b>Pore size<br/>(nm)</b> | <b>Pore volume<br/>(cm<sup>3</sup> g<sup>-1</sup>)</b> |
|--------------------|------------------------------------------------------------|---------------------------|--------------------------------------------------------|
| <b>CoSe/Co-N-C</b> | 177                                                        | 15.14                     | 0.67                                                   |
| <b>CoSe/N-C</b>    | 109                                                        | 16.00                     | 0.44                                                   |
| <b>Co-N-C</b>      | 308                                                        | 6.32                      | 0.49                                                   |
| <b>CoSe</b>        | 17                                                         | 25.72                     | 0.11                                                   |

Figure S5

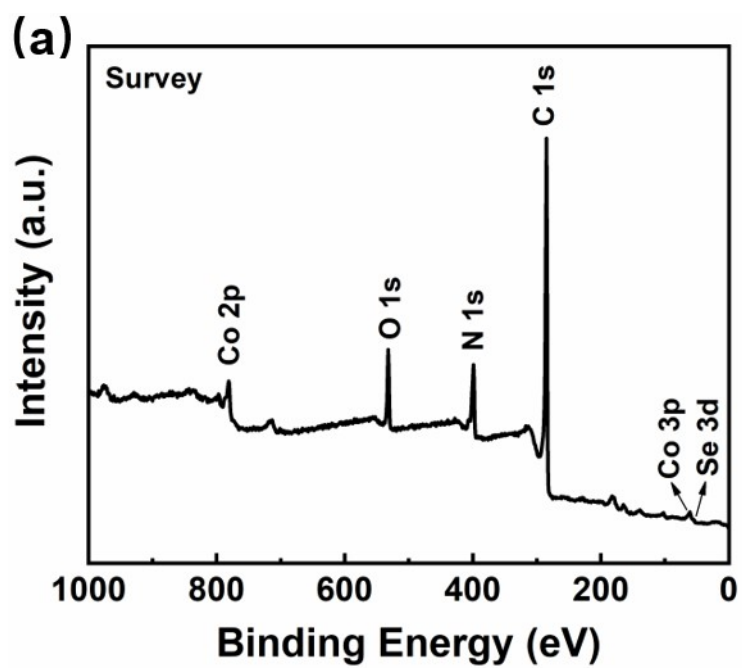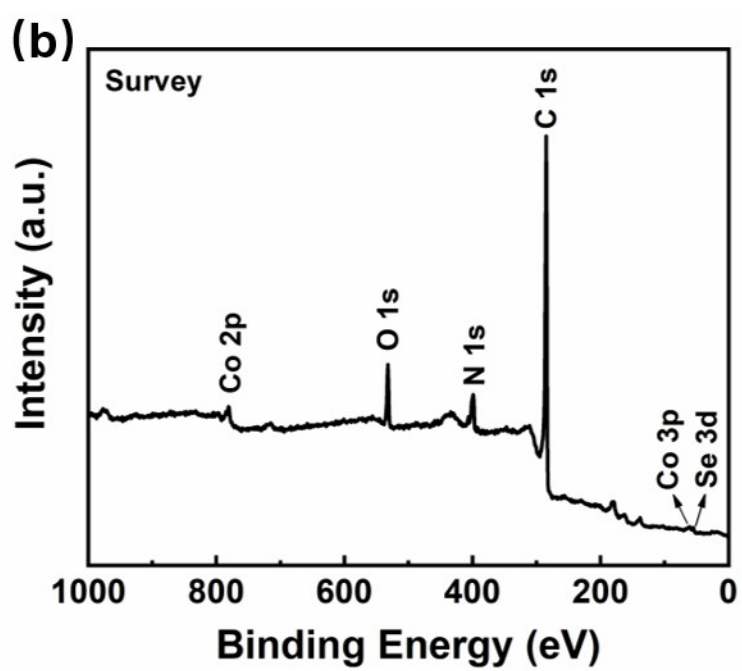

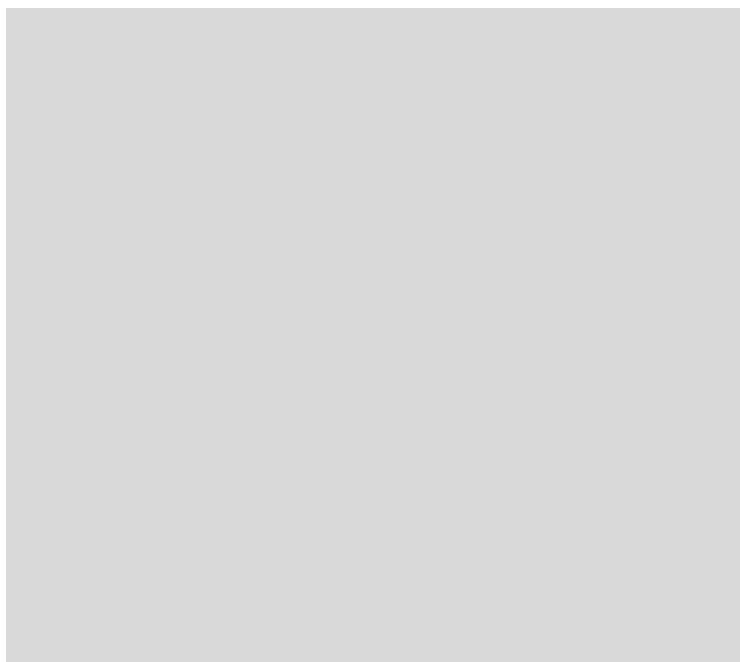

**Figure S5.** XPS survey spectra of (a) CoSe/Co-N-C, (b) CoSe/N-C, and (c) Co-N-C



**Table S2.** Binding energies of Co and Se in CoSe/Co-N-C and CoSe/N-C

| XPS signal |                                    | CoSe/Co-N-C<br>Binding Energy (Ev) | CoSe/N-C<br>Binding Energy (eV) |
|------------|------------------------------------|------------------------------------|---------------------------------|
| Co         | Co <sup>2+</sup> 2p <sub>1/2</sub> | 798.0                              | 797.6                           |
|            | Co <sup>3+</sup> 2p <sub>1/2</sub> | 796.0                              | 795.7                           |
|            | Co <sup>2+</sup> 2p <sub>3/2</sub> | 783.0                              | 781.5                           |
|            | Co <sup>3+</sup> 2p <sub>3/2</sub> | 780.6                              | 780.1                           |
| Se         | 3d <sub>3/2</sub>                  | 55.6                               | 55.9                            |
|            | 3d <sub>5/2</sub>                  | 54.3                               | 54.6                            |

**Table S3.** XPS elemental analysis of CoSe/Co-N-C

| <b>Name</b> | <b>Atomic (%)</b> | <b>Weight (%)</b> |
|-------------|-------------------|-------------------|
| <b>C</b>    | 75.06             | 63.38             |
| <b>N</b>    | 13.85             | 13.64             |
| <b>O</b>    | 7.99              | 9.00              |
| <b>Co</b>   | 2.31              | 9.59              |
| <b>Se</b>   | 0.79              | 4.39              |

**Figure S6**

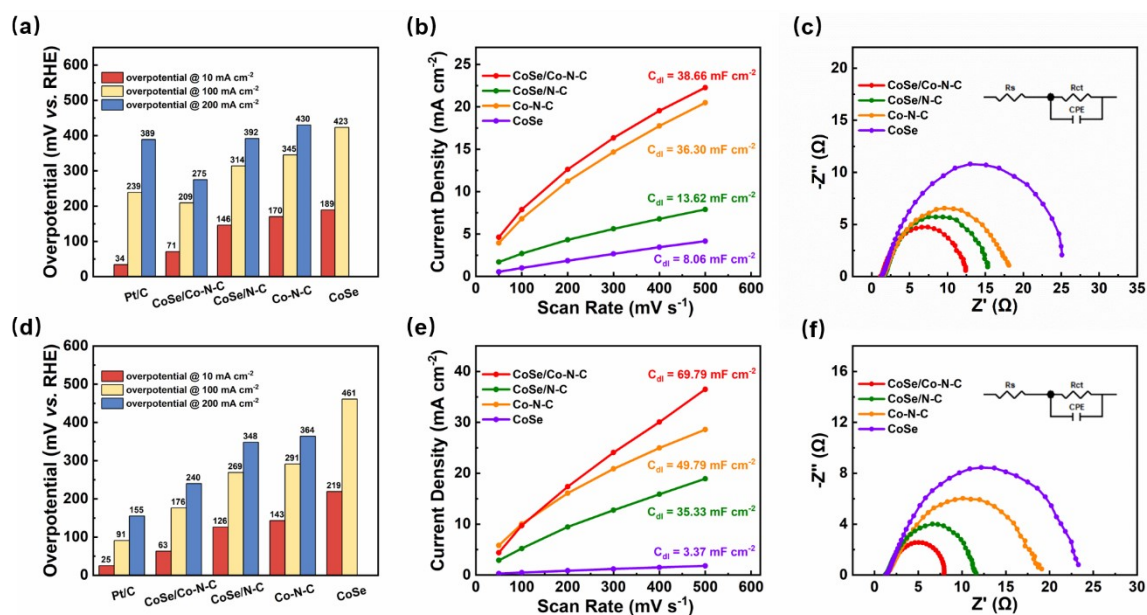

**Figure S6.** HER performances of CoSe/Co-N-C, CoSe/N-C, Co-N-C, CoSe, and 10% Pt/C. (a) summary of  $\eta_{10}$ ,  $\eta_{100}$ , and  $\eta_{200}$ , (b) capacitive current density as a function of scan rates, and (c) Nyquist plots of CoSe/Co-N-C and other references in 1.0 M KOH. (d) summary of  $\eta_{10}$ ,  $\eta_{100}$ , and  $\eta_{200}$ , (e) capacitive current density as a function of scan rates, and (f) Nyquist plots of CoSe/Co-N-C and other references in 0.5 M H<sub>2</sub>SO<sub>4</sub>.

Figure S7

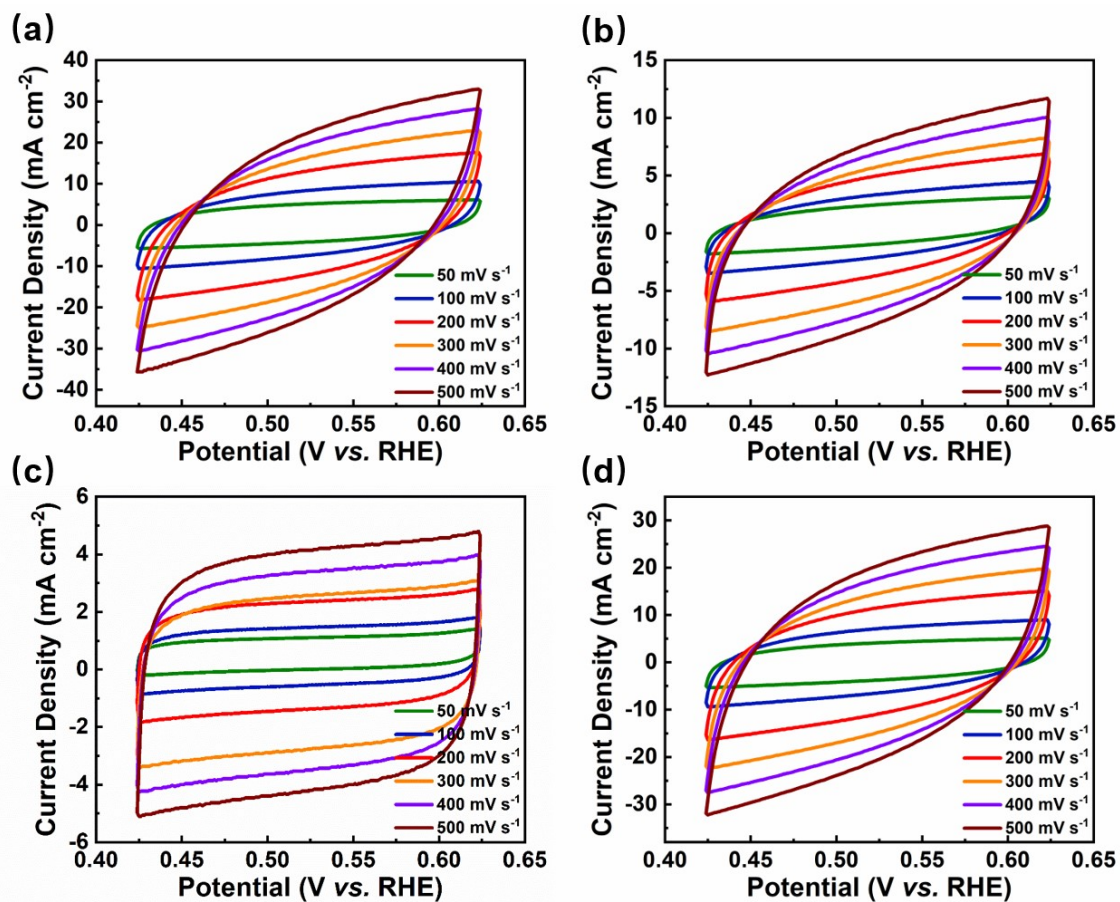

Figure S7. CV spectra of (a) CoSe/Co-N-C, (b) CoSe/N-C, (c) CoSe, and (d) Co-N-C with various scan rates (50-500 mV s<sup>-1</sup>) in 1.0 M KOH.

Figure S8

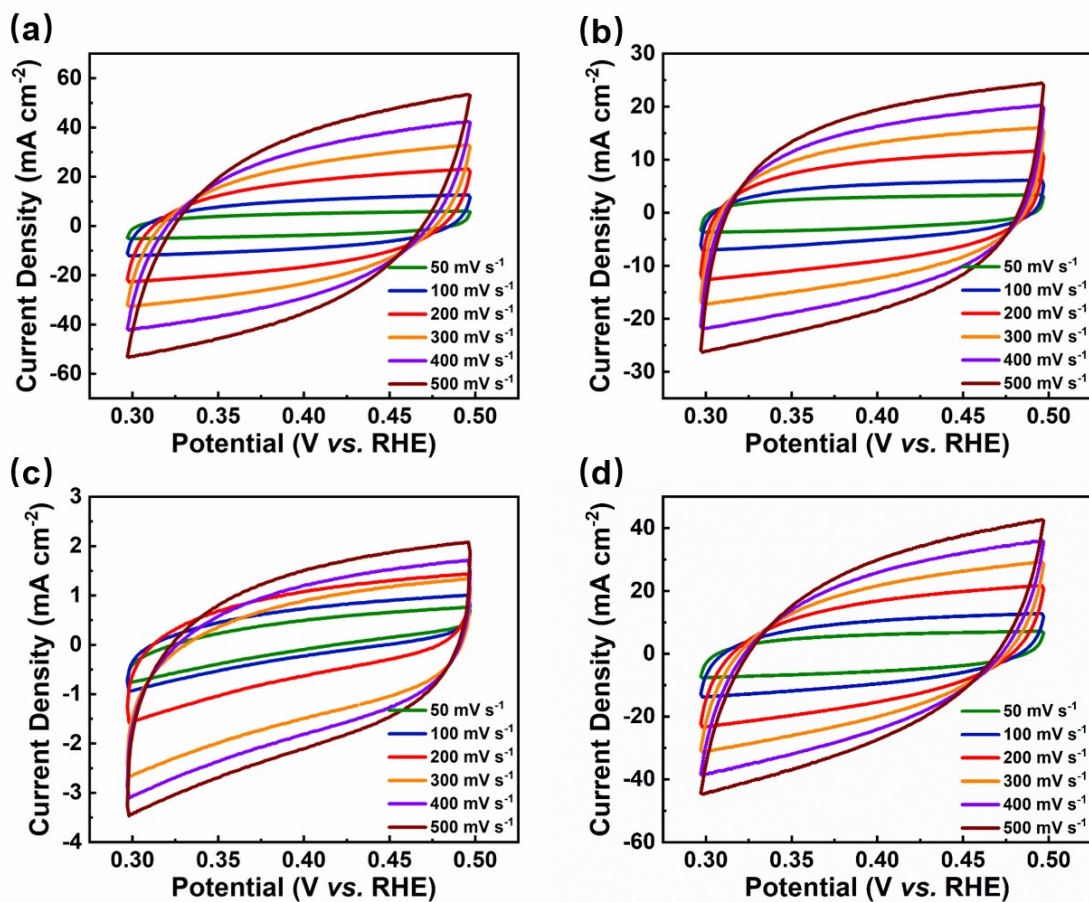

Figure S8. CV spectra of (a) CoSe/Co-N-C, (b) CoSe/N-C, (c) CoSe, and (d) Co-N-C with various scan rates (50-500  $\text{mV s}^{-1}$ ) in 0.5 M  $\text{H}_2\text{SO}_4$ .

**Figure S9**

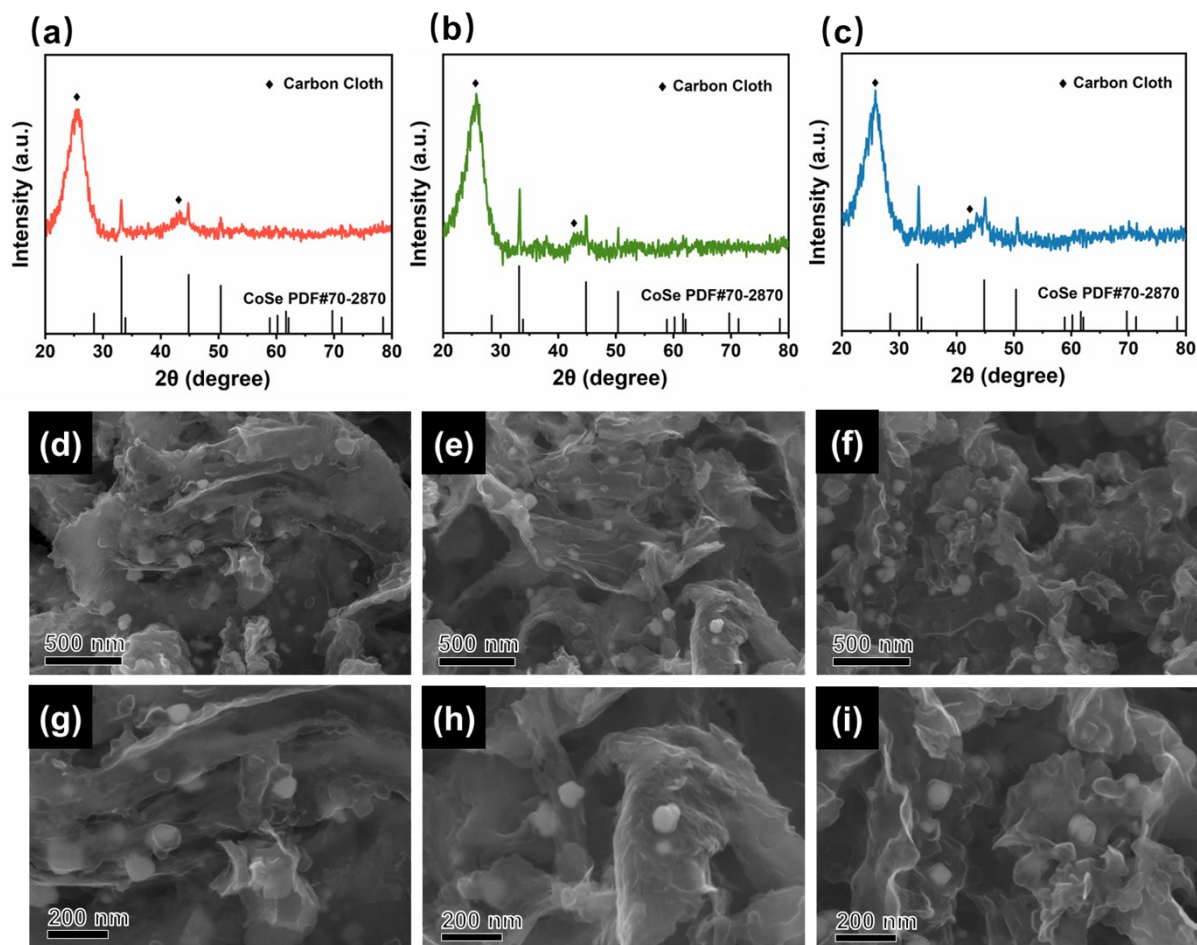

**Figure S9.** (a) XRD spectrum and (d, g) SEM images of CoSe/Co-N-C after 2000 CV electrocatalytic cycles in 1.0 M KOH; (b) XRD spectrum and (e, h) SEM images of CoSe/Co-N-C after 2000 CV electrocatalytic cycles in 0.5 M H<sub>2</sub>SO<sub>4</sub>; (c) XRD spectrum and (f, i) SEM images of CoSe/Co-N-C after 2000 CV electrocatalytic cycles in 1.0 M PBS.

**Table S4.** HER activity summary of CoSe/Co-N-C, CoSe/N-C, Co-N-C, and CoSe in various electrolytes.

| Electrolytes                         |             | $\eta_{10}$ (mV) | $\eta_{100}$ (mV) | $\eta_{200}$ (mV) | Tafel Slope (mV dec <sup>-1</sup> ) |
|--------------------------------------|-------------|------------------|-------------------|-------------------|-------------------------------------|
| 1.0 M KOH                            | CoSe/Co-N-C | 71               | 209               | 275               | 79                                  |
|                                      | CoSe/N-C    | 146              | 314               | 392               | 139                                 |
|                                      | Co-N-C      | 170              | 345               | 430               | 147                                 |
|                                      | CoSe        | 189              | 423               | N/A               | 180                                 |
| 0.5 M H <sub>2</sub> SO <sub>4</sub> | CoSe/Co-N-C | 63               | 176               | 240               | 65                                  |
|                                      | CoSe/N-C    | 126              | 269               | 348               | 108                                 |
|                                      | Co-N-C      | 143              | 291               | 364               | 125                                 |
|                                      | CoSe        | 219              | 461               | N/A               | 153                                 |
| 1.0 M PBS                            | CoSe/Co-N-C | 128              | 293               | 360               | 110                                 |

**Table S5.** Summary of HER performances of CoSe/Co-N-C and other TMSes electrocatalysts in the literatures.

| Catalysts                                 | Tafel slope (mV/dec) | Overpotential (mV)@10mA/cm <sup>2</sup> | Electrolyte                          | Stability (h) | References |
|-------------------------------------------|----------------------|-----------------------------------------|--------------------------------------|---------------|------------|
| CoSe/Co-N-C                               | 79                   | 71                                      | 1.0 M KOH                            | 36            | This work  |
|                                           | 65                   | 63                                      | 0.5 M H <sub>2</sub> SO <sub>4</sub> |               |            |
| CoSe <sub>2</sub> -NC                     | 95                   | 234                                     | 1.0 M KOH                            | 14            | 1          |
|                                           | 62                   | 156                                     | 0.5 M H <sub>2</sub> SO <sub>4</sub> |               |            |
| NiSe <sub>2</sub> @NG                     | 37.8                 | 248                                     | 1.0 M KOH                            | 18            | 2          |
|                                           | 79.8                 | 201                                     | 0.5 M H <sub>2</sub> SO <sub>4</sub> |               |            |
| Ni <sub>0.85</sub> Se@NC                  | 97                   | 135                                     | 1.0 M KOH                            | 10            | 3          |
|                                           | 85                   | 131                                     | 0.5 M H <sub>2</sub> SO <sub>4</sub> |               |            |
| NiSe <sub>2</sub> @NC                     | 88                   | 162                                     | 1.0 M KOH                            | 40            | 4          |
|                                           | 37                   | 183                                     | 0.5 M H <sub>2</sub> SO <sub>4</sub> |               |            |
| MoSe <sub>2</sub> -NiSe@carbon            | 80.6                 | 180                                     | 1.0 M KOH                            | 10            | 5          |
|                                           | 76.3                 | 154                                     | 0.5 M H <sub>2</sub> SO <sub>4</sub> |               |            |
| NiSe@NC                                   | 55.3                 | 250                                     | 1.0 M KOH                            | 12            | 6          |
|                                           | 53.3                 | 123                                     | 0.5 M H <sub>2</sub> SO <sub>4</sub> |               |            |
| Co <sub>0.9</sub> Ni <sub>0.1</sub> Se    | 58                   | 185.7                                   | 0.5 M H <sub>2</sub> SO <sub>4</sub> | -             | 7          |
| CoS <sub>0.46</sub> Se <sub>0.54</sub> @C | 105.43               | 251                                     | 1.0 M KOH                            | -             | 8          |
| Co <sub>0.85</sub> Se@NC                  | 125                  | 230                                     | 1.0 M KOH                            | 10            | 9          |
| CoNiSe/NC                                 | 66.5                 | 100                                     | 1.0 M KOH                            | 3.33          | 10         |
| Co <sub>0.8</sub> Mo <sub>0.2</sub> Se    | 58.7                 | 86.7                                    | 0.5 M H <sub>2</sub> SO <sub>4</sub> | 10            | 11         |
| CoSe@NCNT/NCN                             | 43                   | 197                                     | 0.5 M H <sub>2</sub> SO <sub>4</sub> | 18            | 12         |



**Table S6.** The interaction energies ( $E_{int}$ ) of CoSe/N-C and CoSe/Co-N-C, and the Bader Charge on NC and Co-N-C backbones.

| Samples            | $E_{int}$ (eV) | $C_{NC}/C_{Co-N-C}$ ( e ) |
|--------------------|----------------|---------------------------|
| <b>CoSe/N-C</b>    | -3.20          | 0.15                      |
| <b>CoSe/Co-N-C</b> | -3.48          | 0.34                      |

**Figure S8**

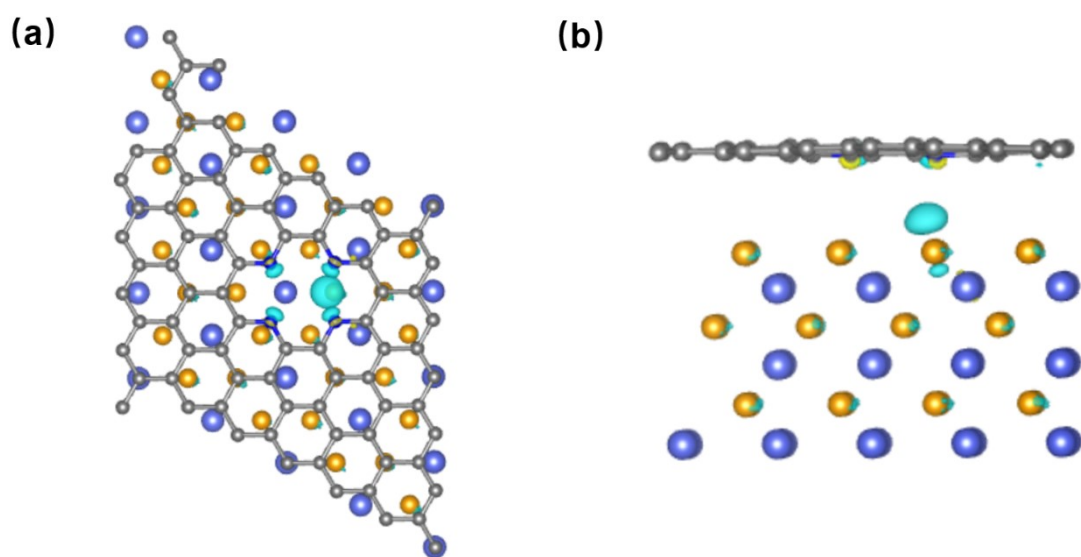

**Figure S8.** (a) Top view and (b) side view of the charge density in the heterostructure interface of CoSe/N-C. The charge accumulation and depletion were colored in cyan and yellow, respectively. Gray balls: C atoms; blue balls: Co atoms; yellow balls: Se atoms.

## Reference

1. H. Lu, Y. Zhang, Y. Huang, C. Zhang and T. Liu, Reaction Packaging CoSe<sub>2</sub> Nanoparticles in N-Doped Carbon Polyhedra with Bifunctionality for Overall Water Splitting, *ACS Appl. Mater. Interfaces*, 2019, **11**, 3372-3381.
2. W. Li, B. Yu, Y. Hu, X. Wang, D. Yang and Y. Chen, Core-Shell Structure of NiSe<sub>2</sub> Nanoparticles@Nitrogen-Doped Graphene for Hydrogen Evolution Reaction in Both Acidic and Alkaline Media, *ACS Sustain. Chem. Eng.*, 2019, **7**, 4351-4359.
3. Z. Huang, B. Xu, Z. Li, J. Ren, H. Mei, Z. Liu, D. Xie, H. Zhang, F. Dai, R. Wang and D. Sun, Accurately Regulating the Electronic Structure of Ni<sub>x</sub>Se<sub>y</sub>@NC Core-Shell Nanohybrids through Controllable Selenization of a Ni-MOF for pH-Universal Hydrogen Evolution Reaction, *Small*, 2020, **16**, 2004231.
4. Z. Huang, S. Yuan, T. Zhang, B. Cai, B. Xu, X. Lu, L. Fan, F. Dai and D. Sun, Selective selenization of mixed-linker Ni-MOFs: NiSe<sub>2</sub>@NC core-shell nano-octahedrons with tunable interfacial electronic structure for hydrogen evolution reaction, *Appl. Catal. B-Environ.*, 2020, **272**, 118976.
5. C. Liu, K. Wang, X. Zheng, X. Liu, Q. Liang and Z. Chen, Rational design of MoSe<sub>2</sub>-NiSe@carbon heteronanostructures for efficient electrocatalytic hydrogen evolution in both acidic and alkaline media, *Carbon*, 2018, **139**, 1-9.
6. Z. Huang, J. Liu, Z. Xiao, H. Fu, W. Fan, B. Xu, B. Dong, D. Liu, F. Dai and D. Sun, A MOF-derived coral-like NiSe@NC nanohybrid: an efficient electrocatalyst for the hydrogen evolution reaction at all pH values, *Nanoscale*, 2018, **10**, 22758-22765.
7. W. Zhong, Z. Wang, N. Gao, L. Huang, Z. Lin, Y. Liu, F. Meng, J. Deng, S. Jin, Q. Zhang and L. Gu, Coupled Vacancy Pairs in Ni-Doped CoSe for Improved Electrocatalytic Hydrogen Production Through Topochemical Deintercalation, *Angew. Chem. Int. Ed.*, 2020, **59**, 22743-22748.
8. J. Sun, G. Li, K. Zheng, Y. He, Z. Guo and C. Xu, Surface Co<sup>3+</sup>-rich engineering of Co(S<sub>x</sub>Se<sub>1-x</sub>)<sub>2</sub> nanocrystals coated with ultrathin carbon layer for efficient OER/HER, *Appl. Surf. Sci.*, 2020, **517**, 146183.
9. T. Meng, J. Qin, S. Wang, D. Zhao, B. Mao and M. Cao, In situ coupling of Co<sub>0.85</sub>Se and N-doped carbon via one-step selenization of metal-organic frameworks as a trifunctional catalyst for overall water splitting and Zn-air batteries, *J. Mater. Chem. A*, 2017, **5**, 7001-7014.
10. C. Jiao, X. Bo and M. Zhou, Electrocatalytic water splitting at nitrogen-doped carbon layers-encapsulated nickel cobalt selenide, *J. Energy Chem.*, 2019, **34**, 161-170.
11. Y. Zhou, J. Zhang, H. Ren, Y. Pan, Y. Yan, F. Sun, X. Wang, S. Wang and J. Zhang, Mo doping induced metallic CoSe for enhanced electrocatalytic hydrogen evolution, *Appl. Catal. B-Environ.*, 2020, **268**, 118467.
12. M. Yang, Y. Yang, K. Wang, S. Li, F. Feng, K. Lan, P. Jiang, X. Huang, H. Yang and R. Li, Facile synthesis of CoSe nanoparticles encapsulated in N-doped carbon nanotubes-grafted N-doped carbon nanosheets for water splitting, *Electrochim. Acta*, 2020, **337**, 135685.
